1 **Update on the mosquito fauna (Diptera: Culicidae) distribution in Cabo**  
2 **Verde: occurrence of the species complexes *Anopheles gambiae* and *Culex***  
3 ***pipiens* (*pipiens*, *quinquefasciatus* and their hybrids)**

4 **Authors and affiliation**

5 Silvânia Da Veiga Leal <sup>1,\*</sup>, Isaias Baptista Fernandes Varela <sup>1</sup>, Davidson Daniel Sousa  
6 Monteiro <sup>1</sup>, Celivianne Marisia Ramos de Sousa <sup>1</sup>, Maria da Luz Lima Mendonça <sup>1</sup>,  
7 Adilson José De Pina <sup>2</sup> Aderitow Augusto Lopes Gonçalves <sup>1</sup>, and Hugo Costa Osório <sup>3,4</sup>

8 <sup>1</sup> Laboratório de Entomologia Médica, Instituto Nacional de Saúde Pública, Largo do  
9 Desastre da Assistência, Chã de Areia, Praia 719, Cabo Verde;

10 <sup>2</sup> Programa de Eliminação do Paludismo, CCS-SIDA, Ministério da Saúde e da Segurança  
11 Social, Varzea, Praia 855, Cabo Verde;

12 <sup>3</sup> Instituto Nacional de Saúde Doutor Ricardo Jorge, Centro de Estudos de Vectores e  
13 Doenças Infecciosas, Avenida da Liberdade 5, 2965-575 Águas de Moura, Portugal;

14 <sup>4</sup> Instituto de Saúde Ambiental, Faculdade de Medicina da Universidade de Lisboa, Av.  
15 Prof. Egas Moniz, Ed. Egas Moniz, Piso 0, Ala C, 1649-028 Lisboa, Portugal

16 \* Correspondence: [silvania.leal@insp.gov.cv](mailto:silvania.leal@insp.gov.cv)

17 **Abstract**

18 In this study, we aimed to update the mosquito species composition and distribution based  
19 on a national entomological survey in all municipalities of Cabo Verde. This includes the  
20 sibling species of the *Culex pipiens* complex, namely *Cx. pipiens*, *Cx. quinquefasciatus*  
21 and their hybrids, in locations where information is not available. The entomological  
22 survey took place from October 2017 to September 2018, in all municipalities of Cabo

23 Verde. Mosquito larvae and pupae were collected in breeding sites and samples were sent  
24 to the Laboratory of Medical Entomology of the National Institute of Public Health for  
25 the morphological identification of the species. The mosquitoes morphologically  
26 identified in *Anopheles gambiae* and *Culex pipiens* complexes of species were further  
27 molecular analysed to species confirmation. A total of 814 breeding sites were surveyed  
28 and 10 mosquito species of five genera were identified. The greatest number of mosquito  
29 species was reported in the island of Santiago. The most widespread species in the country  
30 were *Aedes aegypti* and *Culex quinquefasciatus*. *Anopheles arabiensis* was the only  
31 species identified in the *Gambiae* complex of species. The results of this study will assist  
32 decision makers in important health policies to control mosquitoes and vector-borne  
33 diseases towards a strategic approach by timely detection of changes in species diversity.

## 34 **Introduction**

35 Vector-borne diseases represent a public health problem worldwide. At least 80% of the  
36 world population is at risk of infection by one or more diseases [1]. A large proportion of  
37 these diseases, such as malaria, dengue, chikungunya and Zika their infectious agents are  
38 transmitted by mosquitoes, which represent a major threat to human health, with millions  
39 of deaths annually [2,3].

40 In Cabo Verde some of the mosquito species, namely *Aedes aegypti* and *Anopheles*  
41 *arabiensis*, are vectors of pathogens, increasing the risk of diseases outbreaks. Moreover,  
42 the flow of people and goods between Cabo Verde and other countries poses a risk for  
43 the introduction of new mosquito species into the archipelago, as well as mosquito-borne  
44 pathogens. In the last 10 years, Cabo Verde has been affected by three mosquito-borne  
45 diseases outbreaks: dengue in 2009, Zika in 2015 and malaria in 2017 [3-7]. To evaluate

46 the risk of transmission of vector-borne diseases in a given region, a continuous updating  
47 of the geographic distribution of insect vectors is required [8].

48 The first studies on the mosquito fauna in Cabo Verde date from the last century, after  
49 the identification of *Anopheles gambiae* s.l. in 1909 by Sant'Anna as described by Ribeiro  
50 and collaborators [9]. In 1977, an extensive study was carried out on all nine inhabited  
51 islands, resulting in the first and unique dichotomous key of the mosquitoes of Cabo  
52 Verde, in which eight species were described in the archipelago [10]. In 1984, the species  
53 *Lutzia tigripes* (formerly *Culex tigripes*) was first reported in the country [11]. The last  
54 update of Cabo Verde's mosquito fauna was in 2007, based on bibliographic research,  
55 wherein entomological survey was carried out only in Maio, Santiago, Fogo and Brava  
56 islands. In that study, the species *Culex perexiguus*, a member of the *Culex univittatus*  
57 species complex was reported for the first time [12, 13]. Later, the species *Culex*  
58 *tritaeniorhynchus* was identified, raising to a total of 11 known species of mosquitoes  
59 recognized in the archipelago [14].

60 *Culex pipiens pipiens* and *Culex pipiens quinquefasciatus*, hereinafter referred as *Culex*  
61 *pipiens* and *Culex quinquefasciatus*, are vectors responsible for the transmission of  
62 lymphatic filariasis and neurotropic arboviruses to humans, namely West Nile virus  
63 [15,16]. These sibling species of the *Culex pipiens* complex were described in Cabo Verde  
64 in 1950 and 1980, respectively [10]. The nominal species of the complex, *Culex pipiens*,  
65 is found primarily in temperate zones, while *Cx. quinquefasciatus* occurs in warmer  
66 tropical and subtropical zones with a higher degree of humidity [17]. However, Cabo  
67 Verde is a region where both species coexist in sympatry and where hybrids of the two  
68 species were reported from Fogo and Maio locations [12,18]. Here, high levels of  
69 hybridization rates between the two species were detected, together with second-  
70 generation hybrids identified. The presence of these hybrid forms may locally potentiate

71 the transmission of arboviruses to humans, such as West Nile virus, and therefore it is so  
72 important to have current information about its distribution.

73 In this study, we aimed to update the mosquito species composition and distribution based  
74 on a national entomological survey in all municipalities of Cabo Verde. This includes the  
75 sibling species of the *Culex pipiens* complex, namely *Cx. pipiens*, *Cx. quinquefasciatus*  
76 and their hybrids, in locations where information is not available. Due to the air and  
77 maritime transporting of people and goods in the archipelago, dispersion of species from  
78 one island to another, may have occurred after the last mosquito fauna survey in Cabo  
79 Verde in 2007. This could result in changes of composition, distribution and abundance  
80 of species, which potentially affects the pattern of disease occurrence and transmission.  
81 Our results will assist decision makers in important health policies to control mosquitoes  
82 and vector-borne diseases towards a strategic approach.

## 83 **Methodology**

### 84 **Study area**

85 Cabo Verde is a volcanic archipelago with an area of 4.033 km<sup>2</sup> located about 550 km off  
86 the coast of Senegal in West Africa (Figure 1). The archipelago consists of ten islands,  
87 nine of which are inhabited with about 537.660 inhabitants. It has a warm and dry, arid  
88 and semi-arid climate, with an average annual temperature around 25°C, low rainfall,  
89 with two identified seasons: the dry season, from December to June, and the rainy season,  
90 from August to October [19].

### 91 **Mosquito collection**

92 The entomological survey took place from October 2017 to April 2018 in all  
93 municipalities of Cabo Verde, except in the island of Santo Antão, in which the survey  
94 took place in September 2018. Mosquito larvae and pupae were collected in breeding

95 sites that included domestic containers and others. The samples were sent to the  
96 Laboratory of Medical Entomology (LME) of the National Institute of Public Health in  
97 100 ml pots of water from the breeding site. Larvae L1 and L2 were kept in the insectary  
98 and fed with flocculated food for fish (Tropical mix flakes; Ref: F042.1), for later  
99 assembly of the L3/L4 stages in slides, prior species identification.

#### 100 **Morphological identification**

101 Larvae in development stage L3 and L4 and adults were used in the morphological  
102 identification of mosquito species. The larvae were mounted on slides with 2%  
103 glycerinated Hoyer's medium. Morphological identification of the species was performed  
104 with the aid of a stereomicroscope using dichotomous keys according to Ribeiro et al.  
105 (1980) [10], Ribeiro & Ramos (1995) [9] and auxiliary taxonomic keys according to  
106 Dehghan et al. (2016) [20] and Azari-Hamidian & Harbach (2009) [21].

#### 107 **Molecular analyses**

108 The mosquitoes morphologically identified as *Anopheles gambiae* s.l. and *Culex pipiens*  
109 s.l. were submitted to single total DNA extraction using the NZY Tissue gDNA isolation  
110 kit. Sampled mosquitoes were individually grinded in Lysis Buffer using glass pearls in  
111 2ml Eppendorf and DNA extraction was performed using the prepared lysate suspensions  
112 with the NZY Tissue gDNA isolation kit according to manufacturer's recommendations.  
113 The Identification of *An. gambiae* complex species were performed by PCR-RFLP  
114 following the protocol described by Scott et al. (1993) [22] and Identification of *Cx.*  
115 *pipiens* species was performed according to Smith & Fonseca (2004) [23].

116 **Results**

117 **Identification and geographical distribution of mosquito species**

118 All the municipalities of the islands of Cabo Verde (N = 22) were inspected for mosquito  
119 larvae and pupae in a total of 814 breeding sites. Five genera and 10 mosquito species  
120 were identified (**Error! Reference source not found.**).

121 The greatest number of mosquito species was reported in the islands of Santiago and  
122 Santo Antão (N = 8); followed by Maio (N=7); Boavista, São Vicente, and São Nicolau  
123 (N = 6); Fogo (N=5), Sal and Brava (N = 4) (Figure 1).

124 Figure 1: Geographic distribution of mosquito species in Cabo Verde (*ArcGIS* 10.5).

125 The most widespread species in the country were *Aedes aegypti* and *Culex*  
126 *quinquefasciatus*, present in all islands of the archipelago (N= 09), followed by *Anopheles*  
127 *pretoriensis* (N = 08) and *Culiseta longiareolata* (N = 06). All the other species were  
128 circumscribed to less than five Islands. *Culex tritaeniorhynchus* was the most restricted  
129 species found only on the island of Santiago, in the municipality of Tarrafal (Table 1).

130

131

132

133

134

135

136

137 A total of 156 mosquitoes identified in the *An. gambiae* complex were molecularly  
138 identified as *An. arabiensis* (N = 156; 100%).

139 In the *Culex pipiens* complex the species the *Cx. quinquefasciatus* was the most identified  
140 species (N = 195; 83%) found in every island (Table 2). *Culex pipiens* was found in two  
141 islands, Maio and Santo Antão and in lower frequencies. Hybrid forms were identified in  
142 four islands (Maio, Fogo, Santo Antão and São Nicolau). Higher frequencies of hybrids  
143 were detected in Maio (N = 15; 50%). The species *Culex perexiguus* was not detected.

#### 144 **Discussion**

145 In this study, we present the most recent data on mosquito species distribution in Cabo  
146 Verde based on an entomological survey carried in all municipalities of the country. From  
147 the 10 species reported, four major mosquito vectors with medical importance were  
148 identified, namely *Anopheles arabiensis*, *Aedes aegypti*, *Culex pipiens* and *Cx.*  
149 *quinquefasciatus*.

150 The only malaria vector found in Cabo Verde was *An. arabiensis*, and it was identified  
151 for the first time in Maio and São Vicente in our survey. We corroborate previous studies  
152 reporting this species in Santiago, Fogo and Boavista [12, 24,25], however we found that  
153 its current distribution is wider. The exclusive presence of *An. arabiensis* in Cabo Verde  
154 can be explain by the Sahelian conditions of the archipelago, since this member of the  
155 *An. gambiae* complex is the most tolerant to aridity [26,27].

156 *Aedes aegypti* was identified in all 22 municipalities in the country. This was the second  
157 species of mosquito identified in Cabo Verde in 1930 in São Vicente. Half a century later,  
158 this species was identified on all inhabited islands except in Maio [10]. Although *Ae.*  
159 *aegypti* was not found in the island of Maio in the last entomological survey performed  
160 in 2007 [12], there was evidence of its presence, since the occurrence of cases of dengue

161 and Zika in 2009 and 2015-2016, respectively [5,28]. In this survey, *Ae. aegypti* was  
162 reported in all the municipalities, and at municipality of Maio for the first time [29].

163 *Culex quinquefasciatus* and *Cx. pipiens* are the most ubiquitous mosquitoes in the tropical  
164 and temperate regions of the globe, respectively. In Cabo Verde, these species and their  
165 hybrids have been described since 1950 [10]. Entomological surveys have reported the  
166 presence of *Cx. pipiens* s.l. in all inhabited islands [10,12] which are corroborated in this  
167 study, in which we report its presence in all 22 municipalities. Although *Cx. pipiens* s.s.  
168 was identified in Maio and Santo Antão, which corroborates previous data [10], the  
169 presence of hybrid forms in Fogo and São Nicolau can suggest its presence in these  
170 islands. This brings up to four the locations of the archipelago that are more likely to  
171 present adequate environmental conditions for a contact zone between this species and  
172 *Cx. quinquefasciatus*.

173 *Culex quinquefasciatus* was identified in all inhabited islands of Cabo Verde. When in  
174 sympatry with *Cx. pipiens*, the former was always the most abundant form (N = 195;  
175 83.3%).

176 Hybrid forms of *Cx. quinquefasciatus* and *Cx. pipiens* were found for the first time in  
177 Santo Antão. The subtropical location of the archipelago is likely to present adequate  
178 environmental conditions for a contact zone between the two species, as documented in  
179 previous studies [30]. Interestingly, there is no known hybrid zone between the two  
180 sibling species in mainland Africa, which probably reflects the effect of the Sahara Desert  
181 as a geographic barrier to the distribution of both species.

182 A recent study conducted on Santiago island showed a high human blood index (HBI) in  
183 engorged populations of *Cx. pipiens* s.l., followed by domestic dog and chicken blood  
184 meals (personal communication). Although depending on biotic and abiotic factors,



185 including host-insect interaction factors, mosquito genetic traits, host availability and host  
186 density, it is generally assumed that each *taxa* has a particular biting behaviour, with  
187 *Culex pipiens* showing essentially an ornithophilic preference and *Culex quinquefasciatus*  
188 anthropophilic behaviour [31-43]. Hybrid forms can have intermediary host feeding  
189 patterns which can lead to a different role in pathogen transmission [35, 44-46].

190 *Aedes caspius* was identified in Sal, Boavista, Maio, and for the first time in São Vicente.  
191 *Aedes caspius* was found for the first time by Meira and collaborators in 1952 on the  
192 island of Sal [10,12].

193 Our results show *An. pretoriensis* widespread in Cabo Verde, except in Sal, where it was  
194 never reported (*Entomological Surveillance Bulletins*:  
195 <https://insp.gov.cv/index.php/pilar-02-laboratorio-nacional-de-saude-publica>, accessed  
196 in 27/03/2020). First detection of this species was in São Nicolau, in 1947. Later it was  
197 also reported in the islands of Boavista, São Vicente, Santo Antão, Santiago, Maio, Fogo  
198 and Brava [10].

199 *Culex bitaeniorhynchus* (formerly *Cx. ethiopicus*) was identified on the islands of Santo  
200 Antão and Santiago, where it has always been recorded, since its first identification, in  
201 1977 [10,12]. And the *Culex tritaeniorhynchus* was found only on the island of Santiago  
202 in municipality of Tarrafal. This species was first described in the archipelago in 2011, in  
203 the municipality of Santa Cruz [14], which indicates dissemination of the species.

204 *Culiseta longiareolata* was recorded in Santo Antão, São Nicolau, Sal, Santiago, Fogo  
205 and Brava. This species was first described in 1947, in São Nicolau and Boavista, and in  
206 1977 it was registered on all islands except Sal [8], while *Lutzia tigripes* was identified  
207 in Santo Antão, São Vicente, São Nicolau and Boavista. In Cabo Verde, this species was  
208 first reported in Maio [11], and later in Sal, Santiago and Fogo [12].

209 In this survey, the species *Culex perexiguus* was not detected. This species was reported  
210 for the first time in Santiago in 2010 [12], and since then no more reports of this species  
211 occurred. However, the confirmation of this species, included in the *Cx. univitattus*  
212 complex, in Cabo Verde is important, since this is a competent vector of West Nile,  
213 Sindbis, and Rift Valley fever viruses [47,48].

## 214 **Conclusion**

215 Mosquitoes are the most important group of vectors in public health, because some  
216 species are highly competent for the transmission of pathogens to humans. The  
217 knowledge of the mosquito fauna and its geographic distribution provide important data  
218 to assess the potential transmission risk and outbreak occurrence.

219 With this work, 10 species of mosquitoes were identified in Cabo Verde, including  
220 members of two species complexes, four of which are important vectors of human  
221 pathogens, namely: *Anopheles arabiensis*, *Aedes aegypti*, *Culex pipiens* and *Cx.*  
222 *quinquefasciatus*.

223 The only malaria vector found in Cabo Verde was *An. arabiensis* and we report for the  
224 first time its presence in Maio and São Vicente. *Aedes aegypti* was spread across the  
225 archipelago and it was reported for the first time in Maio and *Aedes caspius* was reported  
226 for the first time in São Vicente.

227 Hybrids forms of *Cx. quinquefasciatus* and *Cx. pipiens* were found in four islands,  
228 bringing up to four the locations of the archipelago that are more likely to these species  
229 occur in sympatry. In this survey *Cx. quinquefasciatus* was the most abundant species of  
230 the *Cx. pipiens* complex.

231 Timely detection of changes in species diversity provide valuable knowledge to health  
232 authorities, the scientific community and entities which may take control measures of  
233 vector populations reducing their impact on public health.

#### 234 **Acknowledgements**

235 We acknowledge the National Institute of Public Health of Cabo Verde for supporting  
236 the study, and the National Program for vector control to all the Health facilities. Also,  
237 we thank the health delegates, control vector agents, drivers, and administrators that  
238 provided their support during the entomological survey. We acknowledge Jonas Antonio  
239 Lopes Gomes, from the National Institute of Public Health of Cabo Verde, for the map  
240 drawing. Special acknowledge Tomás Alves de Só Valdez for trust and support.

#### 241 **Authors' contributions**

242 Design of the study, S.D.V.L. and I.B.F.V.; Collections and laboratory work, D.D.S.M.,  
243 C.M.R.d.S., A.A.L.G., and I.B.F.V.; Data analyses, I.B.F.V., A.A.L.G., H.C.O., and  
244 S.D.V.L. Original Draft Preparation, I.B.F.V., A.A.L.G., H.C.O., D.D.S.M., and  
245 S.D.V.L.; Writing-Review and Editing, I.B.F.V., A.A.L.G., M., A.J.D.P., H.C.O., and  
246 S.D.V.L.; Revision and Supervision, A.J.D.P., and M.d.L.L.M.

#### 247 **Conflict of interest**

248 All authors read and approved the final manuscript.

#### 249 **Financing**

250 The study was made possible through the Program Investing to achieve elimination for  
251 Malaria and impact against TB and HIV in Cape Verde, Grant CPZ-Z-CCSSIDA,  
252 supported by The Global Fund to Fight AIDS, Tuberculosis and Malaria and implemented  
253 by the Coordination Committee of the Fight against AIDS of Cape Verde (CCS-SIDA).

254 **References:**

- 255 1. WHO. Global vector control response 2017–2030. Geneva: World Health  
256 Organization; 2017. Licence: CC BY-NC-SA 3.0 IGO. 2017.
- 257 2. WHO Study Group. Malaria vector control and personal protection. World Health  
258 Organization technical report series, 2006. 936, 1.
- 259 3. World Health Organization. World malaria report 2017. Geneva. Licence: CC  
260 BY-NC-SA 3.0 IGO.
- 261 4. Dia I, Diagne CT, Ba Y, Diallo D, Konate L, and Diallo M. Insecticide  
262 susceptibility of *Aedes aegypti* populations from Senegal and Cape Verde  
263 Archipelago. *Parasites & vectors*. 2012; 5 (1): 238.
- 264 5. Lourenço J, de Lourdes MM, Valdez T, Monteiro JR, Pybus O, and Faria RN.  
265 Epidemiology of the Zika Virus Outbreak in the Cabo Verde Islands, West Africa.  
266 *PLoS Curr*. 2018; 15:10.
- 267 6. DePina AJ, Niang EH, Andrade AJ, Dia AK, Moreira A, Faye O, et al.  
268 Achievement of malaria pre-elimination in Cape Verde according to the data  
269 collected from 2010 to 2016. *Mal J*. 2018; 17: 236.
- 270 7. DePina AJ, Andrade AJ, Dia AK, Moreira AL, Furtado UD, Baptista H, et al.  
271 Spatiotemporal Characterization and risk factor analysis of Malaria Outbreak in  
272 Cabo Verde in 2017. *Tropical Medicine and Health*. 2019; 47:3.
- 273 8. Weaver SC and Reisen WK. Present and future arboviral threats. *Antiviral*  
274 *research*. 2010; 85 (2): 328–345.
- 275 9. Ribeiro H, and da Cunha RH. *Guia ilustrado para a identificação dos mosquitos*  
276 *de Angola (Diptera: Culicidae)*. Sociedade Portuguesa de Entomologia. 1995.

- 277 10. Ribeiro H, Ramos HD, Capela RA, and Pires CA. Os mosquitos de Cabo Verde  
278 (Diptera: Culicidae): Sistemática, distribuição, bioecologia e importância medica.  
279 Junta Invest. Cient. Ultramar Estud. Ens. Dot. 1980; 135: 141.
- 280 11. Cambournac FJ, Oliveira MC, Correia A, Coutinho MA, Torinho J and Soares,  
281 AB. *Culex* (*Lutzia*) *tigripes* (Grandepié); Mais uma espécie nova Para Cabo  
282 Verde. Anais Instituto de Higiene e Medicina Tropical. 1984; 10(1/4): 41-46.
- 283 12. Alves J, Gomes B, Rodrigues R, Silva J, Arez AP, Pinto J, et al. Mosquito fauna  
284 on the Cape Verde Islands (West Africa): an update on species distribution and a  
285 new finding. *Journal of Vector Ecology*. 2010;35 (2): 307-312.
- 286 13. Harbach RE, Culverwell CL, and Kitching IJ. Phylogeny of the nominotypical  
287 subgenus of *Culex* (Diptera: Culicidae): insights from analyses of anatomical data  
288 into interspecific relationships and species groups in an unresolved tree.  
289 *Systematics and Biodiversity*. 2016; 15 (4): 296-306.
- 290 14. Alves J, DePina AJ, Diallo M, and Dia I. First report of *Culex* (*Culex*)  
291 *tritaeniorhynchus* Giles, 1901 (Diptera: Culicidae) in the Cape Verde  
292 Islands. *Zoologia Caboverdiana*. 2014; 5(1): 4-19.
- 293 15. Lourens GB, and Ferrell DK. Lymphatic Filariasis. *The Nursing clinics of North*  
294 *America*. 2019; 54(2): 181–192.
- 295 16. Sule WF, Oluwayelu DO, Hernández-Triana LM, Fooks AR, Venter M, and  
296 Johnson N. Epidemiology and ecology of West Nile virus in sub-Saharan Africa.  
297 *Parasites & vectors*. 2018; 11(1): 414.
- 298 17. Fonseca DM, Smith JL, Wilkerson RC, and Fleischer RC. Pathways of expansion  
299 and multiple introductions illustrated by large genetic differentiation among  
300 worldwide populations of the southern house mosquito. *The American journal of*  
301 *tropical medicine and hygiene*. 2006; 74(2): 284–289.

- 302 18. Gomes B, Alves J, Sousa CA, Santa-Ana M, Vieira I, Silva T L, et al.  
303 Hybridization and population structure of the *Culex pipiens* complex in the islands  
304 of Macaronesia. *Ecology and evolution*. 2012; 2(8): 1889-1902.
- 305 19. Instituto Nacional da Estatística de Cabo Verde. *Projeção Demográficas de Cabo*  
306 *Verde, 2010 – 2030*. 2013.
- 307 20. Dehghan H, Sadraei J, Moosa-Kazemi SH, Abolghasemi E, Solimani H,  
308 Nodoshan AJ, et al. A pictorial key for *Culex pipiens* complex (Diptera:  
309 Culicidae) in Iran. *Journal of arthropod-borne diseases*. 2016; 10(3): 291.
- 310 21. Azari-Hamidian S, and Harbach RE. Keys to the adult females and fourth-instar  
311 larvae of the mosquitoes of Iran (Diptera: Culicidae). *Zootaxa*. 2009; 2078(1): 1-  
312 33.
- 313 22. Scott JA, Brogdon WG, and Collins FH. Identification of single specimens of the  
314 *Anopheles gambiae* complex by the polymerase chain reaction. *The American*  
315 *journal of tropical medicine and hygiene*. 1993; 49(4): 520-529.
- 316 23. Smith JL, and Fonseca DM. Rapid assays for identification of members of the  
317 *Culex (Culex) pipiens* complex, their hybrids, and other sibling species (Diptera:  
318 culicidae). *The American journal of tropical medicine and hygiene*. 2004; 70(4):  
319 339–345.
- 320 24. Cambournac FJ, Petrarca V, and Coluzzi M. *Anopheles arabiensis* in the Cape  
321 Verde archipelago. *Parassitologia*. 1982; 24(2-3): 265.
- 322 25. DePina AJ, Namountougou M, Leal SV, Varela IB, Monteiro DD, de Sousa CM,  
323 et al. Susceptibility of *Anopheles gambiae* Sl to the Insecticides in Praia, Cape  
324 Verde: A Country in the Pre-Elimination of Malaria. *Vector Biol J*. 2018; 3:2.
- 325 26. Coetzee M, Craig M, and le Sueur D. Distribution of African malaria mosquitoes  
326 belonging to the *Anopheles gambiae* complex. *Parasitol. Today*. 2000; 16: 74-77.

- 327 27. Coluzzi M, Sabatini A, della Torre A, Di Deco MA, and Petrarca V. A polytene  
328 chromosome analysis of the *Anopheles gambiae* species complex. *Science*. 2002;  
329 298: 1415-1418.
- 330 28. DePina AJ, Sangare MB, Dia AK, Manyangadze T, Moreira AL, Seck I, et al.  
331 Clinical and Epidemiological Characterization of Dengue Outbreak in Cabo  
332 Verde in 2009-2010. *J Trop Dis* 2019; 7 (296): 2.
- 333 29. Leal S, Varela IB, Gonçalves AL, Monteiro DD, de Sousa CM, Mendonça, ML,  
334 et al. Abundance and Updated Distribution of *Aedes aegypti* (Diptera: Culicidae)  
335 in Cabo Verde Archipelago: A Neglected Threat to Public Health. *International*  
336 *journal of environmental research and public health*. 2020; 17(4): 1291.
- 337 30. Kothera L, Zimmerman EM, Richards CM, and Savage HM. Microsatellite  
338 characterization of subspecies and their hybrids in *Culex pipiens* complex  
339 (Diptera: Culicidae) mosquitoes along a north-south transect in the central United  
340 States. *J. Med. Entomol*. 2009; 46: 236-248.
- 341 31. Farajollahi A, Fonseca DM, Kramer LD, and Kilpatrick AM. “Bird biting”  
342 mosquitoes and human disease: a review of the role of *Culex pipiens* complex  
343 mosquitoes in epidemiology. *Infection, genetics and evolution*. 2011; 11(7): 1577-  
344 1585.
- 345 32. Gomes AC, Silva NN, Marques GR, and Brito M. Host-feeding patterns of  
346 potential human disease vectors in the Paraiba Valley region, State of Sao Paulo,  
347 Brazil. *Journal of Vector Ecology*. 2003; 28: 74-78.
- 348 33. Hamer GL, Kitron UD, Brawn JD, Loss SR, Ruiz MO, Goldberg TL, et al. *Culex*  
349 *pipiens* (Diptera: Culicidae): a bridge vector of West Nile virus to humans. *Journal*  
350 *of medical entomology*. 2008; 45(1): 125-128.

- 351 34. Kilpatrick AM, Kramer LD, Jones MJ, Marra PP, and Daszak P. West Nile virus  
352 epidemics in North America are driven by shifts in mosquito feeding behavior.  
353 PLoS Biology. 2006; 4(4):e82.
- 354 35. Kilpatrick AM, Kramer LD, Jones MJ, Marra PP, Daszak P, and Fonseca DM.  
355 Genetic influences on mosquito feeding behavior and the emergence of zoonotic  
356 pathogens. The American journal of tropical medicine and hygiene. 2007; 77(4):  
357 667-671.
- 358 36. Lehane MJ. The biology of blood-sucking in insects. Cambridge University Press.  
359 2005.
- 360 37. Kilpatrick AM, Daszak P, Jones MJ, Marra PP, and Kramer LD. Host  
361 heterogeneity dominates West Nile virus transmission. Proc Biol Sci. 2006;  
362 273(1599): 2327-2333.
- 363 38. Molaei G, Andreadis TG, Armstrong PM, Bueno JR, Dennett JA, Real SV et al.  
364 Host feeding pattern of *Culex quinquefasciatus* (Diptera: Culicidae) and its role  
365 in transmission of West Nile virus in Harris County, Texas. The American journal  
366 of tropical medicine and hygiene. 2007; 77(1): 73-81.
- 367 39. Kay BH, Boreham PFL, and Williams GM. Host preferences and feeding patterns  
368 of mosquitoes (Diptera: Culicidae) at Kowanyama, Cape York Peninsula,  
369 northern Queensland. Bulletin of Entomological Research. 1979;69(3): 441-457.
- 370 40. Rizzoli A, Bolzoni L, Chadwick EA, Capelli G, Montarsi F, Grisenti M, et al.  
371 Understanding West Nile virus ecology in Europe: *Culex pipiens* host feeding  
372 preference in a hotspot of virus emergence. Parasites & vectors. 2015; 8(1): 213.
- 373 41. Thiemann TC, and Reisen WK. Evaluating sampling method bias in *Culex tarsalis*  
374 and *Culex quinquefasciatus* (Diptera: Culicidae) bloodmeal identification studies.  
375 Journal of medical entomology. 2012; 49(1): 143-149.



- 376 42. Thiemann TC, Lemenager DA, Klueh S, Carroll BD, Lothrop HD, and Reisen WK.  
377 Spatial variation in host feeding patterns of *Culex tarsalis* and the *Culex pipiens*  
378 complex (Diptera: Culicidae) in California. *Journal of medical entomology*. 2012;  
379 49(4): 903-916.
- 380 43. Turell MJ, Dohm DJ, Sardelis MR, O'guinn ML, Andreadis TG, and Blow JA.  
381 An update on the potential of North American mosquitoes (Diptera: Culicidae) to  
382 transmit West Nile virus. *Journal of medical entomology*. 2005; 42(1): 57-62.
- 383 44. Fonseca DM, Keyghobadi N, Malcolm CA, Mehmet C, Schaffner F, Mogi M, et  
384 al. Emerging vectors in the *Culex pipiens* complex. *Science*. 2004; 303(5663):  
385 1535-1538.
- 386 45. Huang S, Hamer GL, Molaei G, Walker ED, Goldberg TL, Kitron UD, et al.  
387 Genetic variation associated with mammalian feeding in *Culex pipiens* from a  
388 West Nile virus epidemic region in Chicago, Illinois. *Vector-Borne and Zoonotic*  
389 *Diseases*. 2009; 9(6): 637-642.
- 390 46. Vogels CB, Fros JJ, Göertz GP, Pijlman GP, and Koenraadt CJ. Vector  
391 competence of northern European *Culex pipiens* biotypes and hybrids for West  
392 Nile virus is differentially affected by temperature. *Parasites & vectors*. 2016;  
393 9(1): 393.
- 394 47. Jupp PG, McIntosh BM, and Blackburn NK. Experimental assessment of the  
395 vector competence of *Culex (Culex) neavei* Theobald with West Nile and Sindbis  
396 viruses in South Africa. *Trans. R. Soc. Trop. Med. Hyg.* 1986; 80: 226-230.
- 397 48. Turell MJ, Presley SM, Gad AM, Cope SE, Dohm DJ, Morrill JC, et al. Vector  
398 competence of Egyptian mosquitoes for Rift Valley fever virus. *Am. J. Trop. Med.*  
399 *Hyg.* 1996; 54: 136-139.

401

402 Figure 2: Geographic distribution of mosquito species in Cabo Verde (*ArcGIS 10.5*).

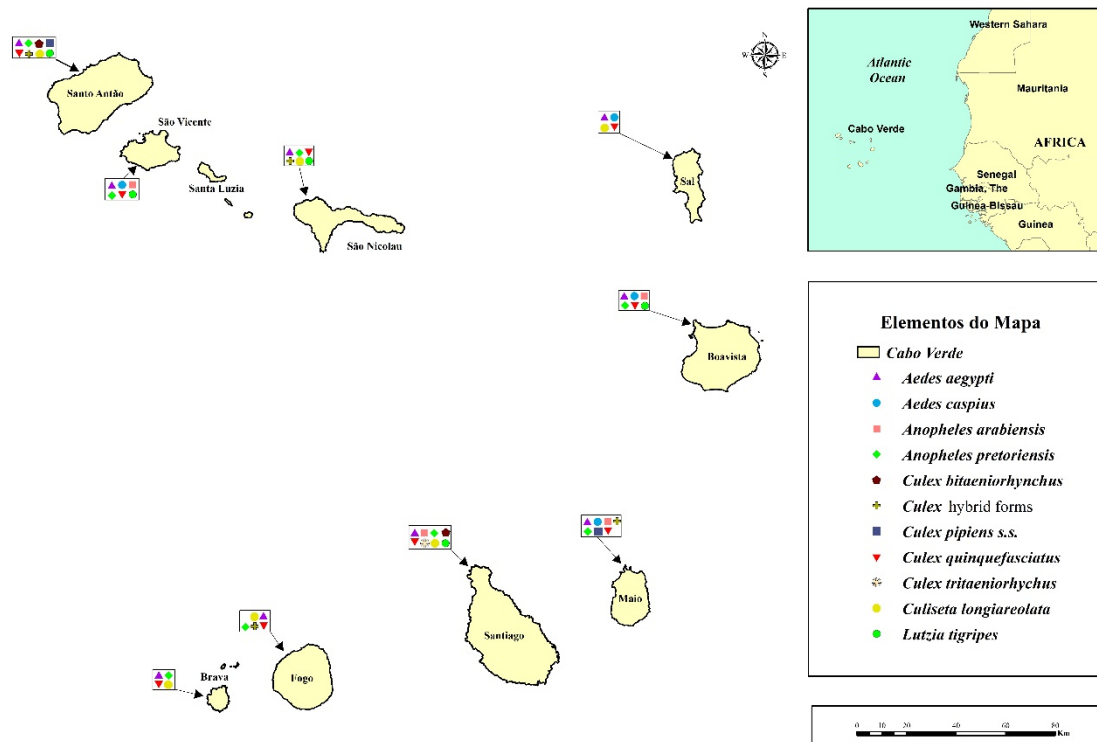

403

405 Table 1: Species composition in the islands of Cabo Verde.

| Island             | Species            |                    |                       |                         |                             |                         |                             |                              |                              |                          |                     |
|--------------------|--------------------|--------------------|-----------------------|-------------------------|-----------------------------|-------------------------|-----------------------------|------------------------------|------------------------------|--------------------------|---------------------|
|                    | <i>Ae. aegypti</i> | <i>Ae. caspius</i> | <i>An. arabiensis</i> | <i>An. pretoriensis</i> | <i>Cx. bitaeniorhynchus</i> | <i>Cx. pipiens</i> s.s. | <i>Cx. quinquefasciatus</i> | <i>Culex pipiens hybrids</i> | <i>Cx. tritaeniorhynchus</i> | <i>Cs. longiareolata</i> | <i>Lz. tigripes</i> |
| <b>Santo Antão</b> | X                  |                    |                       | X                       | X                           | x                       | x                           | x                            |                              | X                        | X                   |
| <b>São Vicente</b> | X                  | X                  | X                     | X                       |                             |                         | x                           |                              |                              |                          | X                   |
| <b>São Nicolau</b> | X                  |                    |                       | X                       |                             |                         | x                           | x                            |                              | X                        | X                   |
| <b>Sal</b>         | X                  | X                  |                       |                         |                             |                         | x                           |                              |                              | X                        |                     |
| <b>Boavista</b>    | X                  | X                  | X                     | X                       |                             |                         | x                           |                              |                              |                          | X                   |
| <b>Maio</b>        | X                  | X                  | X                     | X                       |                             | x                       | x                           | x                            |                              |                          |                     |
| <b>Santiago</b>    | X                  |                    | X                     | X                       | X                           |                         | x                           |                              | X                            | X                        | X                   |
| <b>Fogo</b>        | X                  |                    |                       | X                       |                             |                         | x                           | x                            |                              | X                        |                     |
| <b>Brava</b>       | X                  |                    |                       | X                       |                             |                         | x                           |                              |                              | X                        |                     |

407 Table 2. Frequencies of *Culex pipiens*, *Cx. quinquefasciatus* and their hybrids in Cabo Verde determined by the molecular assay ACE-2.  
 408

| Species                     | N          | Localities |          |          |          |          |          |           |            |            |
|-----------------------------|------------|------------|----------|----------|----------|----------|----------|-----------|------------|------------|
|                             |            | Maio       | Boavista | Brava    | Fogo     | Sal      | Santiago | S. Antão  | S. Nicolau | S. Vicente |
| <i>Cx. pipiens</i>          | 9 (3.8)    | 5 (16.7)   |          |          |          |          |          | 4 (13.3)  |            |            |
| <i>Cx. quinquefasciatus</i> | 195 (83.3) | 10 (33.3)  | 23 (100) | 30 (100) | 2 (66.7) | 29 (100) | 30 (100) | 15 (50.0) | 26 (86.7)  | 30 (100)   |
| Hybrids                     | 31 (13.2)  | 15 (50.0)  |          |          | 1 (33.3) |          |          | 11 (36.7) | 4 (13.3)   |            |
| <b>Total</b>                | 235        | 30         | 23       | 30       | 3        | 29       | 30       | 30        | 30         | 30         |

409 \*(% in brackets)

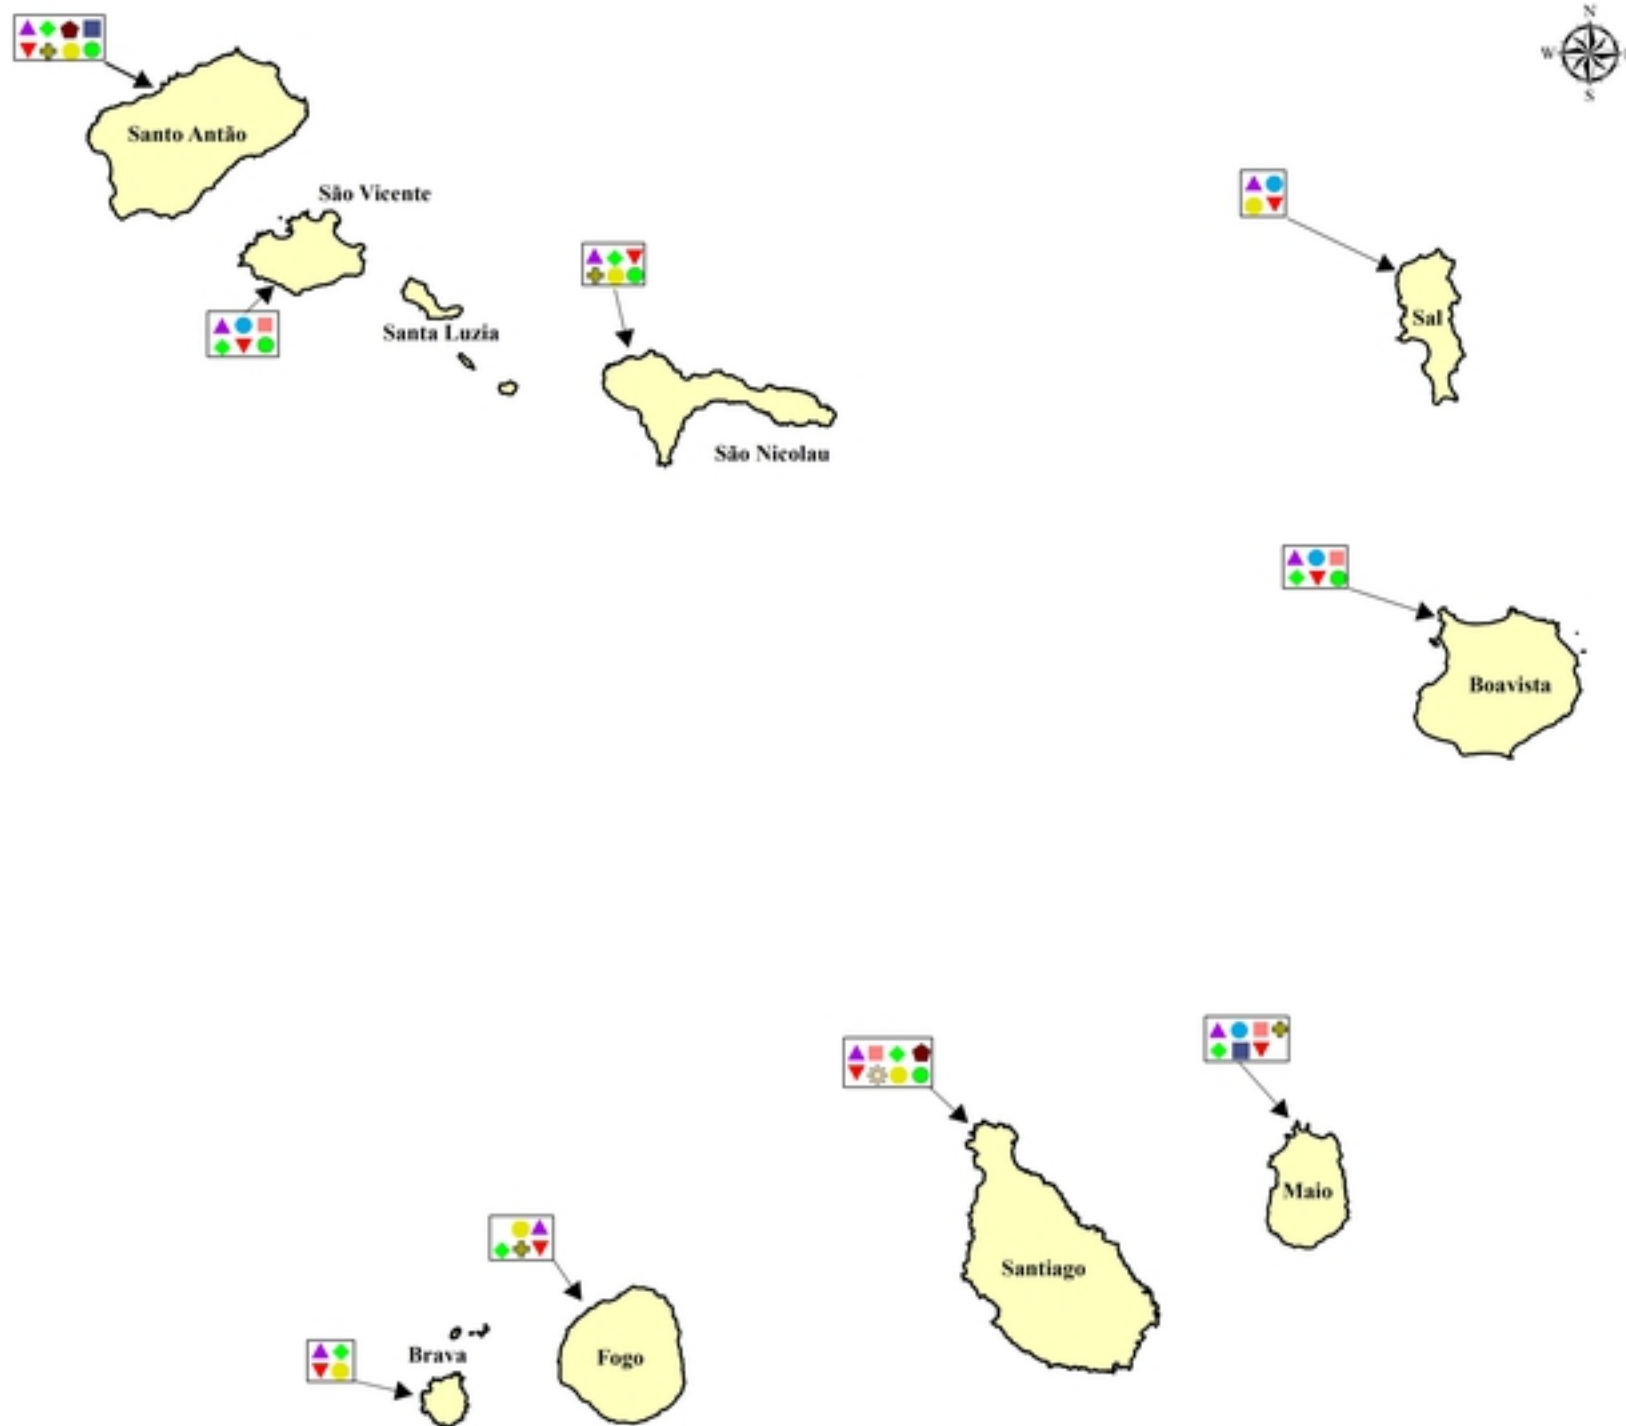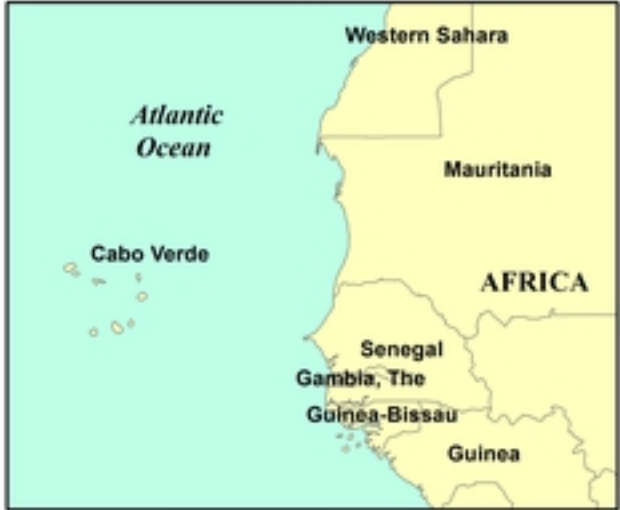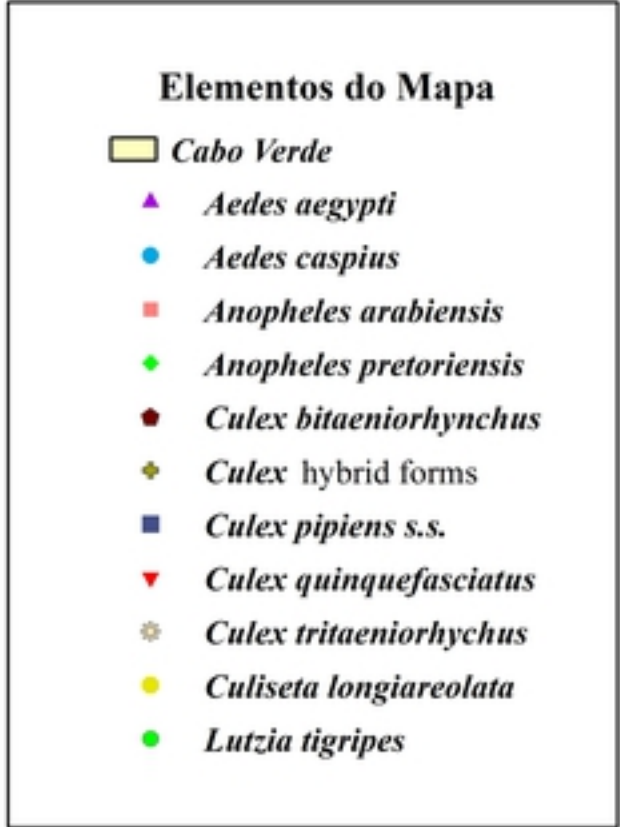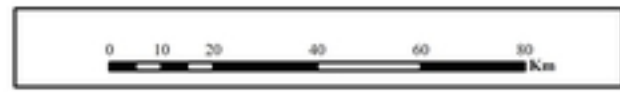

Figure

Table 1: Species composition in the islands of Cabo Verde.

| Island             | Species            |                    |                       |                         |                             |                         |                             |                              |                              |                          |                     |
|--------------------|--------------------|--------------------|-----------------------|-------------------------|-----------------------------|-------------------------|-----------------------------|------------------------------|------------------------------|--------------------------|---------------------|
|                    | <i>Ae. aegypti</i> | <i>Ae. caspius</i> | <i>An. arabiensis</i> | <i>An. pretoriensis</i> | <i>Cx. bitaeniorhynchus</i> | <i>Cx. pipiens s.s.</i> | <i>Cx. quinquefasciatus</i> | <i>Culex pipiens hybrids</i> | <i>Cx. tritaeniorhynchus</i> | <i>Cs. longiareolata</i> | <i>Lz. tigripes</i> |
| <b>Santo Antão</b> | X                  |                    |                       | X                       | X                           | x                       | x                           | x                            |                              | X                        | X                   |
| <b>São Vicente</b> | X                  | X                  | X                     | X                       |                             |                         | x                           |                              |                              |                          | X                   |
| <b>São Nicolau</b> | X                  |                    |                       | X                       |                             |                         | x                           | x                            |                              | X                        | X                   |
| <b>Sal</b>         | X                  | X                  |                       |                         |                             |                         | x                           |                              |                              | X                        |                     |
| <b>Boavista</b>    | X                  | X                  | X                     | X                       |                             |                         | x                           |                              |                              |                          | X                   |
| <b>Maio</b>        | X                  | X                  | X                     | X                       |                             | x                       | x                           | x                            |                              |                          |                     |
| <b>Santiago</b>    | X                  |                    | X                     | X                       | X                           |                         | x                           |                              | X                            | X                        | X                   |
| <b>Fogo</b>        | X                  |                    |                       | X                       |                             |                         | x                           | x                            |                              | X                        |                     |
| <b>Brava</b>       | X                  |                    |                       | X                       |                             |                         | x                           |                              |                              | X                        |                     |

1 Table 2. Frequencies of *Culex pipiens*, *Cx. quinquefasciatus* and their hybrids in Cabo Verde determined by the molecular assay ACE-2.

| Species                     | N             | Localities   |             |             |             |             |             |              |              |             |
|-----------------------------|---------------|--------------|-------------|-------------|-------------|-------------|-------------|--------------|--------------|-------------|
|                             |               | Maio         | B. Vista    | Brava       | Fogo        | Sal         | Santiago    | S. Antão     | S. Nicola    | S. Vicente  |
| <i>Cx. pipiens</i>          | 9<br>(3.8)    | 5<br>(16.7)  |             |             |             |             |             | 4<br>(13.3)  |              |             |
| <i>Cx. quinquefasciatus</i> | 195<br>(83.3) | 10<br>(33.3) | 23<br>(100) | 30<br>(100) | 2<br>(66.7) | 29<br>(100) | 30<br>(100) | 15<br>(50.0) | 26<br>(86.7) | 30<br>(100) |
| Hybrids                     | 31<br>(13.2)  | 15<br>(50.0) |             |             | 1<br>(33.3) |             |             | 11<br>(36.7) | 4<br>(13.3)  |             |
| <b>Total</b>                | 235           | 30           | 23          | 30          | 3           | 29          | 30          | 30           | 30           | 30          |

2 \*(% in brackets)

3
